# Supplementary material for: Array of bis-quaternary ammonium surfactant tailored Cu(2−x)Te quantum dots with amended functional assets
Source: Royal Society of Chemistry journal article supplement (doi:10.1039/c5ra24396c), 2016-01-01
Supplement: c5ra24396c1.pdf [file c5ra24396c1.pdf]

## Array of bis-quaternary ammonium surfactants tailored $\text{Cu}_{(2-x)}\text{Te}$ quantum dots with amended functional assets

Deepika Jamwal<sup>†</sup>, Dolly Rana<sup>†</sup>, Dinesh Pathak<sup>§\*</sup>, Pankaj Raizada<sup>†</sup>, Pankaj Thakur<sup>†,‡\*</sup>

<sup>†</sup>School of Chemistry, Faculty of Basic Sciences, Shoolini University, Solan (HP)-173212, India

<sup>§</sup>Faculty of Chemical Technology, University of Pardubice, Pardubice 53210, Czech Republic

<sup>‡</sup>Istituto Italiano Di Tecnologia (Center for Advanced Biomaterials for Healthcare) Naples 80125, Italy

**Table 1.** Average particle sizes, as determined by XRD of (12-2-12), (14-2-14) and (16-2-16) capped copper telluride nanoparticles.

| NPs                                         | 2θ<br>(degree) | FWHM | Average Particle size<br>(nm) |
|---------------------------------------------|----------------|------|-------------------------------|
| (12-2-12)<br>+ $\text{Cu}_{(2-x)}\text{Te}$ | 36.51          | 0.60 | 15.24                         |
|                                             | 43.45          | 0.28 |                               |
|                                             | 50.58          | 0.80 |                               |
|                                             | 61.63          | 0.86 |                               |
|                                             | 73.77          | 0.97 |                               |
| (14-2-14)<br>+ $\text{Cu}_{(2-x)}\text{Te}$ | 26.78          | 0.19 | 28.76                         |
|                                             | 36.51          | 0.52 |                               |
|                                             | 43.45          | 0.46 |                               |
|                                             | 50.58          | 0.25 |                               |
|                                             | 61.63          | 0.24 |                               |
| (16-2-16)<br>+ $\text{Cu}_{(2-x)}\text{Te}$ | 36.51          | 0.45 | 34.69                         |
|                                             | 43.45          | 0.37 |                               |
|                                             | 50.58          | 0.23 |                               |
|                                             | 61.63          | 0.19 |                               |
|                                             | 73.77          | 0.22 |                               |

**Table 2.** Peak assignment of different bis-quaternary ammonium surfactants in the absence and presence of  $\text{Cu}_{(2-x)}\text{Te}$  nanoparticles.

| Peak assignment           | (12-2-12) | (12-2-12)-<br>$\text{Cu}_{(2-x)}\text{Te}$ | (14-2-14) | (14-2-14)-<br>$\text{Cu}_{(2-x)}\text{Te}$ | (16-2-16) | (16-2-16)-<br>$\text{Cu}_{(2-x)}\text{Te}$ |
|---------------------------|-----------|--------------------------------------------|-----------|--------------------------------------------|-----------|--------------------------------------------|
| $\nu_{\text{asym}}$ (C-H) | 2959      | 2953                                       | 2959      | 2919                                       | 2959      | 2919                                       |
|                           | 2925      | 2921                                       | 2922      | ---                                        | 2922      | ---                                        |
| $\nu_{\text{sym}}$ (C-H)  | 2858      | 2851                                       | 2854      | 2848                                       | 2854      | 2848                                       |
| $\delta_{\text{s}}$ (C-H) | 1469      | 1454                                       | 1469      | 1463                                       | 1469      | 1463                                       |
| $\nu$ (C-N <sup>+</sup> ) | 1160      | ---                                        | 1160      | ---                                        | 1160      | ---                                        |

|      |      |      |      |      |     |
|------|------|------|------|------|-----|
| 1056 | 1015 | 1015 | 1046 | 1042 | --- |
| 974  | 840  | 840  | 833  | 972  | 844 |

**Table 3.** Geometric parameters of Cu<sub>(2-x)</sub>Te nanoparticles with different bis-quaternary ammonium surfactants.

| NPs                                  | Scherrer Method | Williamson-Hall Method |                          |                                        |                        |                         |                              |                           |                       |                                      |                           |                                                  | Size-Strain Plot | TEM                       |                       |                                         |                           |
|--------------------------------------|-----------------|------------------------|--------------------------|----------------------------------------|------------------------|-------------------------|------------------------------|---------------------------|-----------------------|--------------------------------------|---------------------------|--------------------------------------------------|------------------|---------------------------|-----------------------|-----------------------------------------|---------------------------|
|                                      |                 | UDM                    |                          |                                        | USDM                   |                         |                              | UEDM                      |                       |                                      |                           |                                                  |                  |                           |                       |                                         |                           |
|                                      |                 | Size, <i>D</i><br>(nm) | Strain, $\epsilon$<br>T  | Strain, $\epsilon$<br>C                | Size, <i>D</i><br>(nm) | Strain, $\epsilon$<br>T | Strain, $\epsilon$<br>C      | Stress, $\sigma$<br>(MPa) | Size <i>D</i><br>(nm) | Strain, $\epsilon$<br>(Tensile Only) | Stress, $\sigma$<br>(MPa) | Energy Density, <i>u</i><br>(KJm <sup>-3</sup> ) |                  |                           | Size <i>D</i><br>(nm) | Strain ( $\epsilon$ )<br>(Tensile Only) | Stress, $\sigma$<br>(MPa) |
| Cu <sub>(2-x)</sub> Te-<br>(12-2-12) | 15.24           | 9.2                    | NA                       | -4.0<br>&<br>-6.5<br>x10 <sup>-3</sup> | 13                     | 1.818                   | -2.318                       | 209.80                    | 51                    | 1.76<br>x10 <sup>-2</sup>            | 38.33                     | 6.37                                             | 81               | 3.984                     | 458.16                | 912.65                                  | 25<br>±10.8               |
| Cu <sub>(2-x)</sub> Te-<br>(14-2-14) | 28.76           | 11.9                   | 9.5<br>x10 <sup>-3</sup> | -4.3<br>x10 <sup>-4</sup>              | 12.8                   | 1.2                     | -4.6896<br>x10 <sup>-3</sup> | 160.89                    | 81                    | 1.66<br>x10 <sup>-2</sup>            | 50.38                     | 81.03                                            | 73               | -0.300<br>(C)             | 165.49                | 119.88                                  | 45<br>±18.7               |
| Cu <sub>(2-x)</sub> Te-<br>(16-2-16) | 34.69           | 90.5                   | 3.8x<br>10 <sup>-3</sup> | -1.52<br>x10 <sup>-2</sup>             | 85.5                   | 4.450                   | -0.0017                      | 511.7                     | 50.6                  | 1.55<br>x10 <sup>-2</sup>            | 9.69                      | 0.42                                             | 85.5             | 5.44<br>x10 <sup>-1</sup> | 62.56                 | 17.02                                   | 130<br>±31.6              |
